# Supplementary material
Source: ML conference proceedings conference paper supplement (https://openreview.net/forum?id=Ng8wWGXXIXh)
Supplement: supplementary_material [file attachment]

| Experiment   | $p$ -value             |
|--------------|------------------------|
| Example1.E0  | $3 \times 10^{-21}$    |
| Example1.E1  | $1 - 2 \times 10^{-8}$ |
| Example1.E2  | $1 - 2 \times 10^{-8}$ |
| Example1s.E0 | $3 \times 10^{-21}$    |
| Example1s.E1 | $1 - 4 \times 10^{-7}$ |
| Example1s.E2 | $1 - 5 \times 10^{-8}$ |
| Example2.E0  | $2 \times 10^{-6}$     |
| Example2.E1  | $2 \times 10^{-6}$     |
| Example2.E2  | $5 \times 10^{-6}$     |
| Example2s.E0 | $7 \times 10^{-5}$     |
| Example2s.E1 | $8 \times 10^{-5}$     |
| Example2s.E2 | $2 \times 10^{-4}$     |
| Example3.E0  | 0.01                   |
| Example3.E1  | $7 \times 10^{-3}$     |
| Example3.E2  | 0.02                   |
| Example3s.E0 | 0.35                   |
| Example3s.E1 | 0.21                   |
| Example3s.E2 | 0.35                   |

Table 1:  $p$ -value for IRMv1A vs. IRMv1 on the LinearUnitTests experiment.  $p$ -value is computed using Welch’s  $t$ -test [1]. The effective degrees of freedom are computed using the Welch–Satterthwaite equation.

[1] Welch, Bernard L. “The generalization of ‘Student’s’ problem when several different population variances are involved.” *Biometrika* 34.1-2 (1947): 28-35.
